# Supplementary material for: A new fluorescence and colorimetric sensor for highly selective and sensitive detection of glucose in 100% water
Source: Royal Society of Chemistry journal article supplement (doi:10.1039/c5ra11116a), 2015-01-01

## Supporting Information

### **A new fluorescence and colorimetric sensor for highly selective and sensitive detection of glucose in 100% water**

Youming Shen,<sup>ab</sup> Xiangyang Zhang,<sup>\*a</sup> Xi Huang,<sup>b</sup> Youyu Zhang,<sup>\*b</sup> Chunxiang Zhang,<sup>a</sup> Junling Jin,<sup>a</sup> Xuwen Liu,<sup>a</sup> Haitao Li,<sup>b</sup> and Shouzhuo Yao<sup>b</sup>

<sup>a</sup> College of Chemistry and Chemical Engineering, Hunan University of Arts and Science, ChangDe, 415000, PR China E-mail: zhangxiangy06@163.com

<sup>b</sup> Key Laboratory of Chemical Biology and Traditional Chinese Medicine Research (Ministry of Education), College of Chemistry and Chemical Engineering, Hunan Normal University, Changsha 410081, PR China E-mail: zhangyy@hunnu.edu.cn

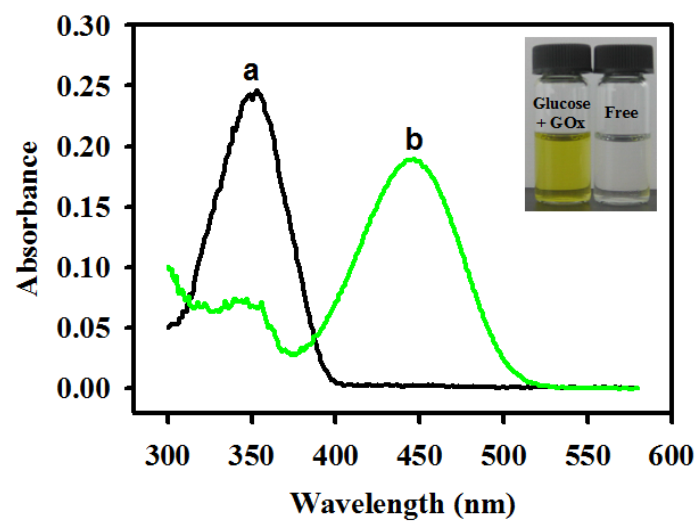

Fig. S1 UV-vis absorption spectra of probe on interaction with 120  $\mu\text{M}$  glucose in the presence (b) and absence (a) of 10  $\mu\text{g}/\text{mL}$  GOx in PBS buffered solution (50 mM, pH = 7.0).

Table S1 Determination of glucose in urine samples spiked with glucose (n = 3)

| Samples | Test ( $\mu\text{M}$ ) | Added ( $\mu\text{M}$ ) | Recovery (%) | RSD (%) |
|---------|------------------------|-------------------------|--------------|---------|
| Blank   | Not found              | 0                       | -            | -       |
| 1       | 32.3                   | 30                      | 106.8        | 2.13    |
| 2       | 61.8                   | 60                      | 105.7        | 3.63    |
| 3       | 93.2                   | 90                      | 102.2        | 1.67    |

Table S2 Calculated absorption wavelengths ( $\lambda_{\text{abs}}$ ), excitation energies (Ex), oscillator strengths  $f$ , and dominant excitation character of compound **1** and **1-H<sub>2</sub>O<sub>2</sub>** reaction product. Calculations were performed at PCM (H<sub>2</sub>O)-TD-B3LYP/6-31+G (d, p) // B3LYP/6-31+G (d, p) level.

| Compound                            | Transition                     | $\lambda_{\text{abs}}$ | Ex      | $f$   | composition |
|-------------------------------------|--------------------------------|------------------------|---------|-------|-------------|
| <b>1</b>                            | S <sub>0</sub> →S <sub>1</sub> | 359.87                 | 3.45 eV | 0.363 | H→L (98%)   |
|                                     | S <sub>0</sub> →S <sub>2</sub> | 326.77                 | 3.79 eV | 0.042 | H-1→L (89%) |
| <b>1-H<sub>2</sub>O<sub>2</sub></b> | S <sub>0</sub> →S <sub>1</sub> | 445.35                 | 2.78 eV | 0.219 | H→L (97%)   |
|                                     | S <sub>0</sub> →S <sub>3</sub> | 307.63                 | 4.03 eV | 0.056 | H→L+1 (66%) |
|                                     |                                |                        |         |       | H→L+2 (13%) |
|                                     |                                |                        |         |       | H-2→L (12%) |

Table S3 Calculated emission wavelengths ( $\lambda_{em}$ ), emission energies (Em), oscillator strengths  $f$ , and dominant excitation character of compound **1** and **1**-H<sub>2</sub>O<sub>2</sub> reaction product. Calculations were performed at PCM (H<sub>2</sub>O)-TD-B3LYP/6-31+G (d, p) // TD-B3LYP/6-31+G (d, p) level.

| Compound                                | Transition                     | $\lambda_{em}$ | Em      | $f$   | Composition |
|-----------------------------------------|--------------------------------|----------------|---------|-------|-------------|
| <b>1</b>                                | S <sub>1</sub> →S <sub>0</sub> | 404.86         | 3.06 eV | 0.346 | H→L (98%)   |
|                                         | S <sub>3</sub> →S <sub>0</sub> | 337.82         | 3.67 eV | 0.026 | H-1→L (89%) |
| <b>1</b> -H <sub>2</sub> O <sub>2</sub> | S <sub>1</sub> →S <sub>0</sub> | 536.93         | 2.31 eV | 0.126 | H→L (98%)   |
|                                         | S <sub>3</sub> →S <sub>0</sub> | 315.69         | 3.93 eV | 0.037 | H→L+1 (71%) |
|                                         |                                |                |         |       | H-2→L (11%) |

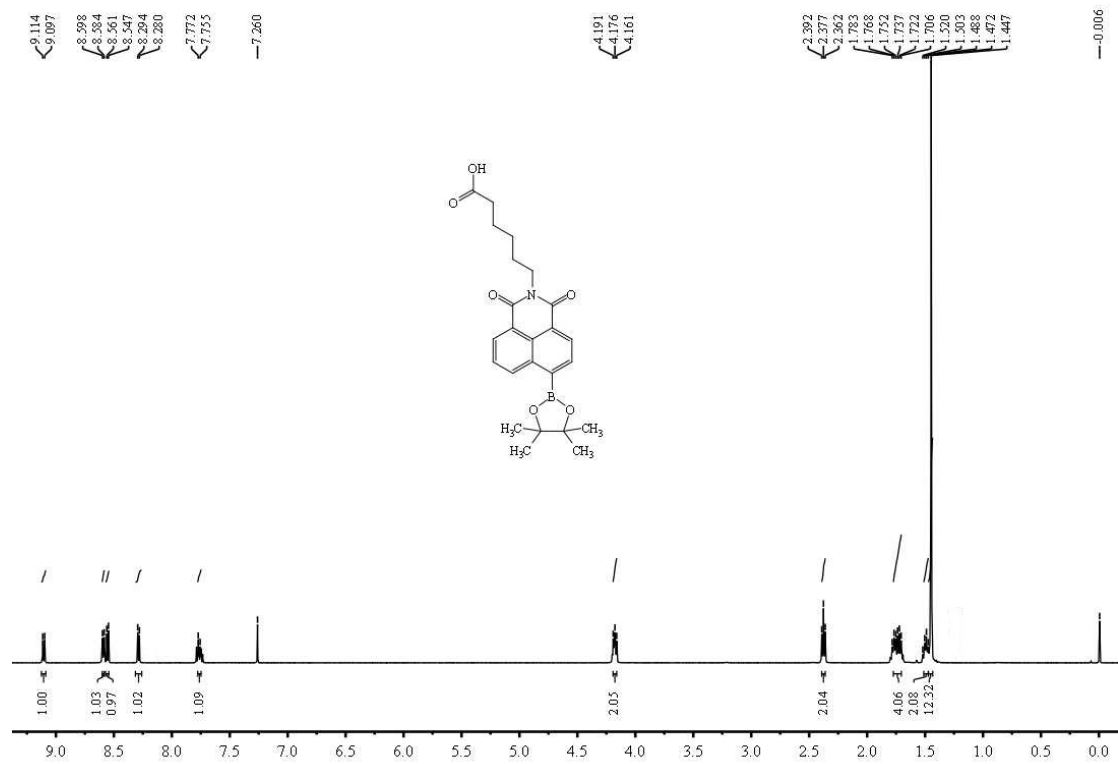

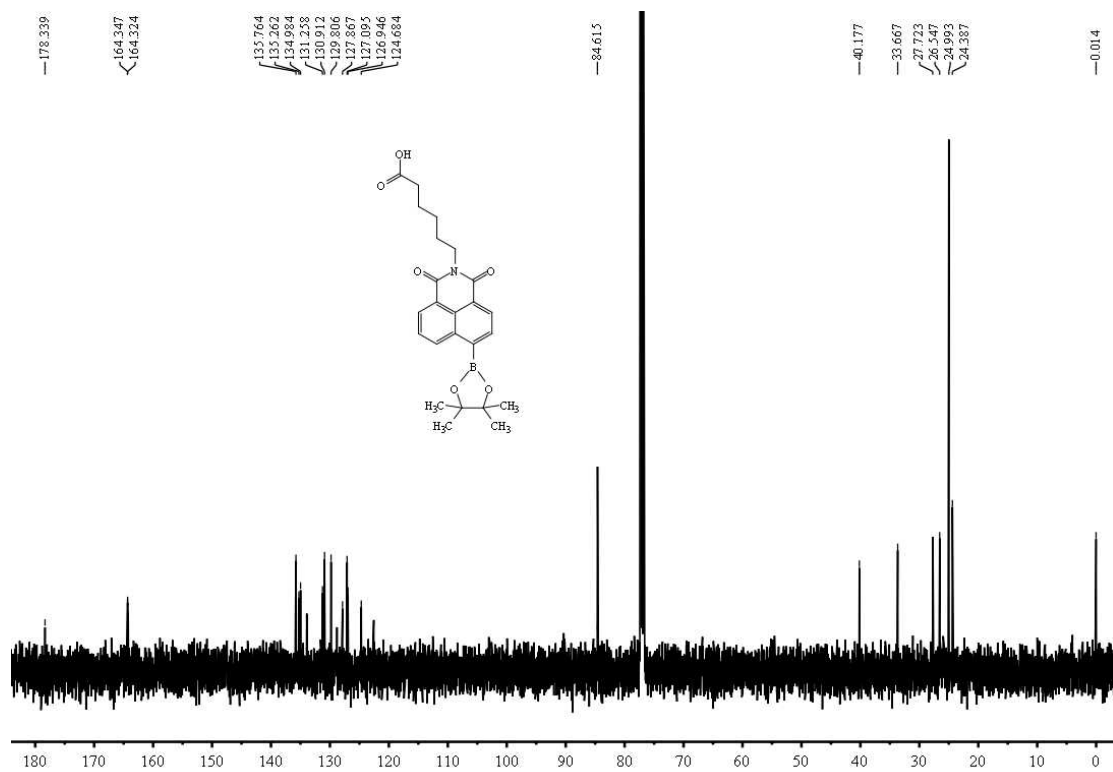

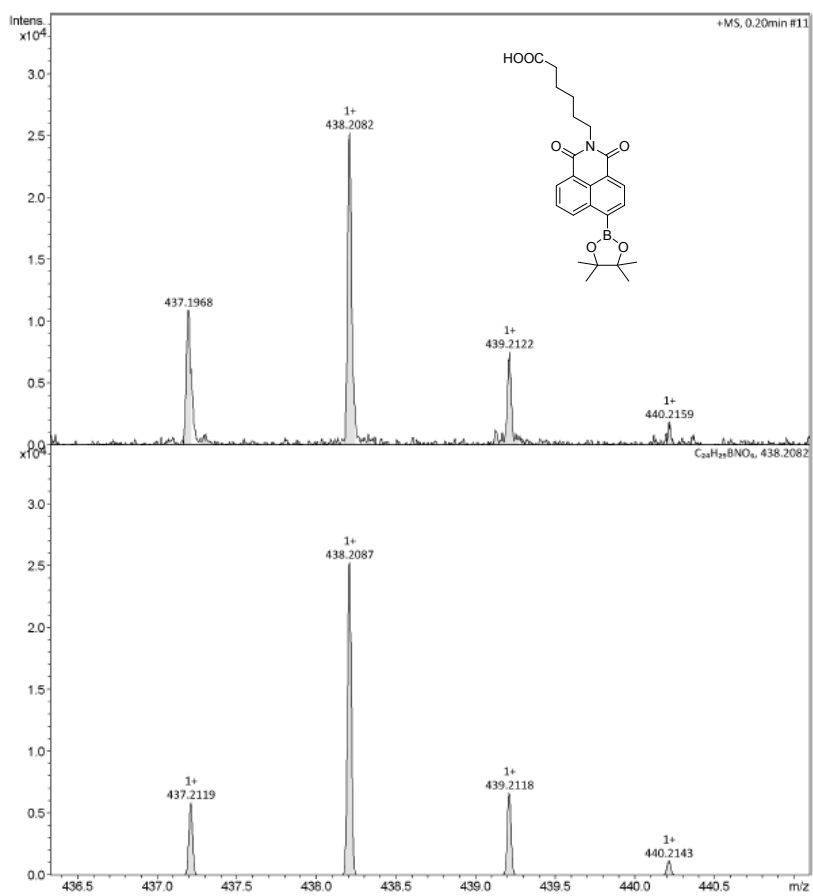



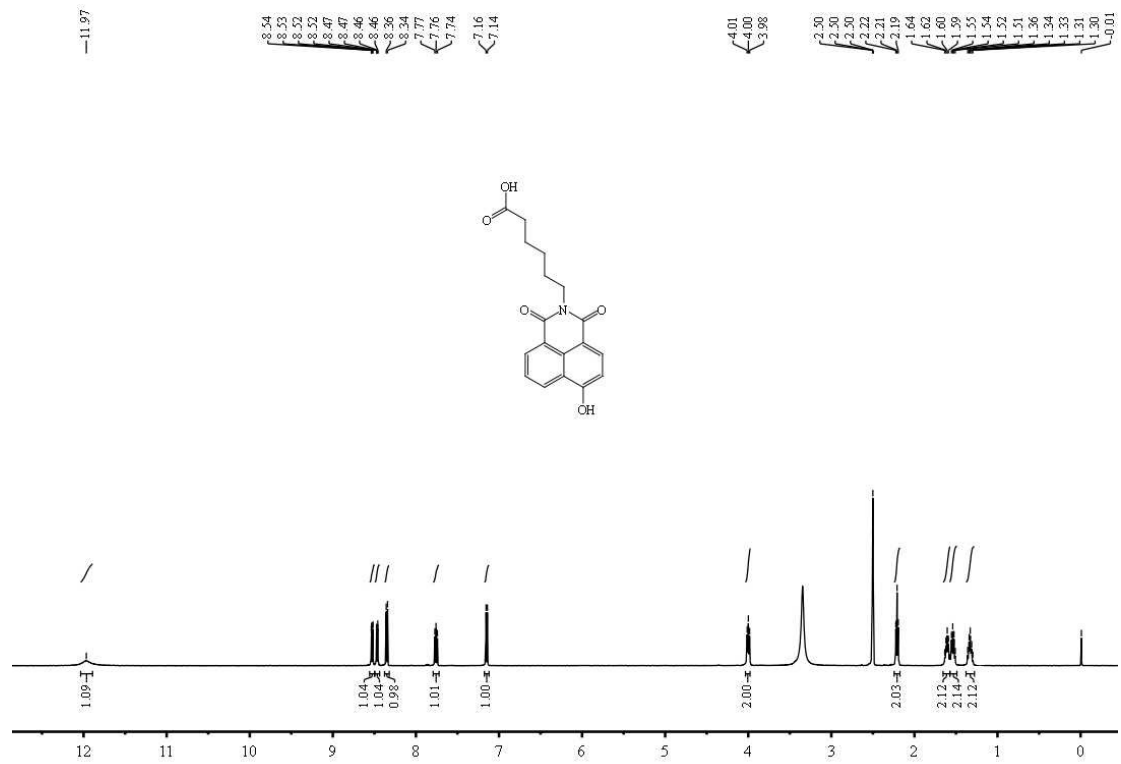

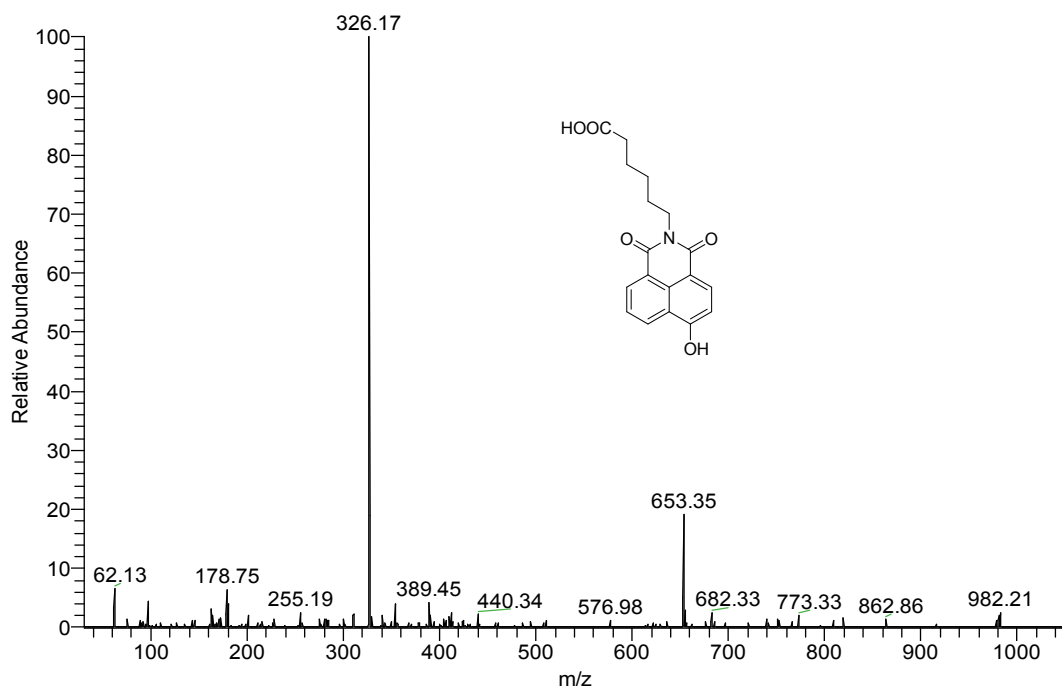

Supplement: c5ra11116a1.pdf [file c5ra11116a1.pdf]
